# Supplementary material
Source: PubMed Central journal article supplement (PMC7948290)
Supplement: advancesADV2020002973-suppl1.pdf [file advancesADV2020002973-suppl1.pdf]

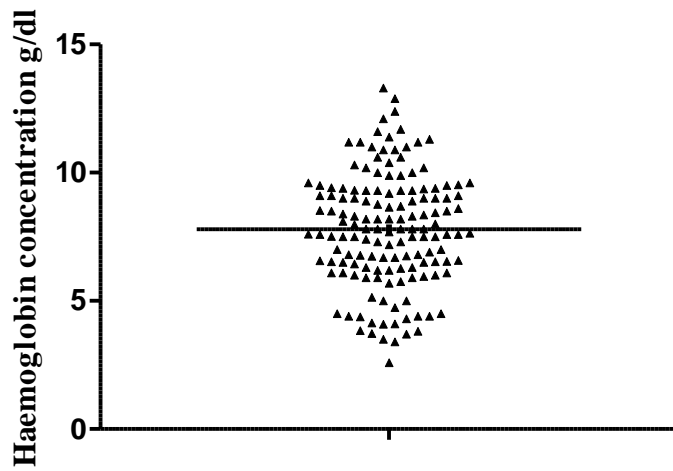

**Supplementary figure 1: Low baseline hemoglobin level at diagnosis.** Anemia was a frequent finding at the time of diagnosis, with a median haemoglobin of 7.8g/dl, range 2.6 – 13.3g/dl.

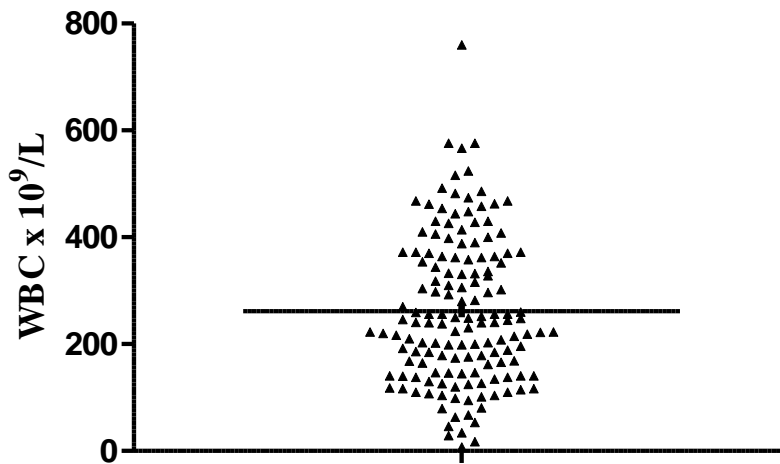

**Supplementary figure 2: High baseline white blood cell count at diagnosis.** Median WBC 241.0 x10<sup>9</sup>/L, range 8.0 – 760.0 x 10<sup>9</sup>/L.

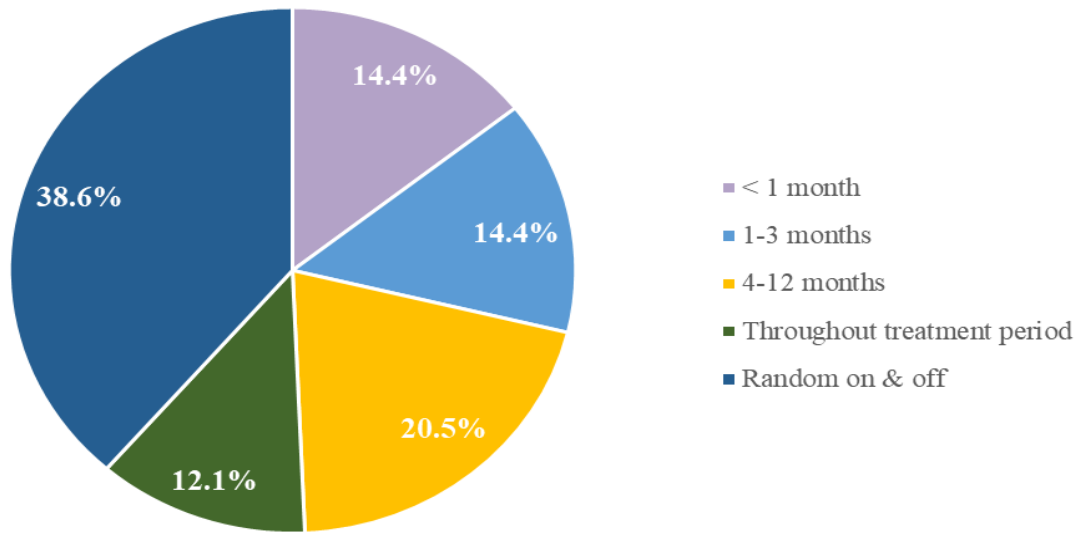

**Supplementary figure 3: Imatinib side effects not limited to first months of treatment.** A significant number of patients (38.6%) reported side effects at various times beyond 12 months of treatment.

**Supplementary table 1. Univariate and multivariate logistic regression of clinical and treatment related factors associated with Sub-optimal molecular response**

| Variable                       | Molecular Response       |                     | COR, 95% CI               | AOR, 95% CI               |
|--------------------------------|--------------------------|---------------------|---------------------------|---------------------------|
|                                | Sub optimal<br>n=119 (%) | Optimal<br>n=39 (%) |                           |                           |
| <b>Abdominal Fullness</b>      |                          |                     |                           |                           |
| Present                        | 107 (78.7)               | 29 (21.3)           | <b>3.08 (1.21,7.83)*</b>  | 2.41 (0.91, 6.39)         |
| Not present                    | 12 (54.5)                | 10 (45.5)           | 1.00                      | 1.00                      |
| <b>Previous BT</b>             |                          |                     |                           |                           |
| Yes                            | 45 (86.5)                | 7 (13.5)            | <b>2.78 (1.13, 6.82)*</b> | <b>2.76 (1.10, 6.94)*</b> |
| No                             | 74 (69.8)                | 32 (30.2)           | 1.00                      | 1.00                      |
| <b>Sokal Risk Groups</b>       |                          |                     |                           |                           |
| Low                            | 6 (60.0)                 | 4 (40.0)            | 1.00                      | -                         |
| Intermediate                   | 40 (78.4)                | 11 (21.6)           | 2.43 (0.58, 10.15)        | -                         |
| High                           | 34 (79.1)                | 9 (20.9)            | 2.52 (0.58, 10.89)        | -                         |
| <b>Cytopenia from Imatinib</b> |                          |                     |                           |                           |
| Present                        | 77 (81.9)                | 17 (18.1)           | <b>2.37 (1.14, 4.95)*</b> | <b>2.19 (1.02, 4.73)*</b> |
| Not present                    | 42 (65.6)                | 22 (34.4)           | 1.00                      | 1.00                      |
| <b>Adherence</b>               |                          |                     |                           |                           |
| High                           | 29 (72.5)                | 11 (27.5)           | 1.00                      | -                         |
| Medium                         | 37 (74.0)                | 13 (26.0)           | 1.08 (0.42, 2.76)         |                           |
| Low                            | 53 (77.9)                | 15 (22.0)           | 1.34 (0.54, 3.30)         | -                         |

\* variables with p value < 0.05; BT, Blood transfusion; COR Crude Odds Ratio; AOR, Adjusted Odds Ratio; CI, Confidence Interval

**Supplementary table 2. Analysis of Hematologic data at diagnosis in relation to ELN response categories**

| Variable                             | Molecular Response |                       | Difference in means (optimal – suboptimal) | P value         |
|--------------------------------------|--------------------|-----------------------|--------------------------------------------|-----------------|
|                                      | Optimal Mean (SD)  | Sub optimal Mean (SD) |                                            |                 |
| WBC Level (x10 <sup>9</sup> /L)      | 276.8 (141.0)      | 211.8 (114.7)         | <b>65.03 (135.5)</b>                       | <b>&lt;0.01</b> |
| Hemoglobin level (g/dL)              | 7.7 (2.1)          | 8.3 (2.36)            | -0.60 (2.20)                               | 0.19            |
| Platelet count (x10 <sup>9</sup> /L) | 384 (266)          | 304 (186)             | 80.5 (249.6)                               | 0.05            |

WBC, white blood cells; SD, standard deviation

**Supplementary table 3. Molecular responses among patients with data available for sokal and disease phase, n=158**

|                               | Molecular Response |             |           | P-value |
|-------------------------------|--------------------|-------------|-----------|---------|
|                               | Optimal            | Sub optimal | Total     |         |
| <b>Data for Sokal score</b>   |                    |             |           |         |
| Present                       | 24 (23.1)          | 80 (76.9)   | 104 (100) | 0.561   |
| Absent                        | 15 (27.8)          | 39 (72.2)   | 54 (100)  |         |
| <b>Data for disease phase</b> |                    |             |           |         |
| Present                       | 31 (23.5)          | 101 (76.5)  | 132 (100) | 0.459   |
| Absent                        | 8 (30.8)           | 18 (69.2)   | 26 (100)  |         |

**Supplementary table 4. Molecular data, Sokal score and time point assessed for each patient.**

| No. | Age (yrs) | Sex | Sokal Score Category | Duration on Imatinib (mo) | BCR-ABL/ABL ratio | ELN time point (mo) | ELN Response Category | Outcome at 22 mo |
|-----|-----------|-----|----------------------|---------------------------|-------------------|---------------------|-----------------------|------------------|
| 1   | 35        | F   | high                 | 13                        | 6.6               | 12                  | Failure               | Alive            |
| 2   | 50        | M   | low                  | 42                        | 14                | 12                  | Failure               | Alive            |
| 3   | 60        | F   | –                    | 55                        | 1.5               | 12                  | Failure               | Alive            |
| 4   | 26        | F   | low                  | 17                        | 100               | 12                  | Failure               | Died             |
| 5   | 49        | M   | high                 | 18                        | 0.006             | 12                  | Optimal               | Alive            |
| 6   | 25        | F   | intermediate         | 5                         | 19                | 3                   | Failure               | Alive            |
| 7   | 51        | M   | high                 | 9                         | 21                | 6                   | Failure               | Alive            |
| 8   | 43        | M   | intermediate         | 99                        | 9.8               | 12                  | Failure               | Alive            |
| 9   | 36        | F   | intermediate         | 6                         | 0.48              | 6                   | Optimal               | Alive            |
| 10  | 41        | M   | intermediate         | 7                         | 20                | 6                   | Failure               | Alive            |
| 11  | 38        | F   | low                  | 15                        | 0.1               | 12                  | Optimal               | Alive            |
| 12  | 70        | M   | intermediate         | 37                        | 91                | 12                  | Failure               | Alive            |
| 13  | 47        | F   | intermediate         | 10                        | 32                | 6                   | Failure               | Alive            |
| 14  | 29        | M   | high                 | 15                        | 60                | 12                  | Failure               | Alive            |
| 15  | 37        | F   | intermediate         | 84                        | 21                | 12                  | Failure               | Died             |
| 16  | 32        | F   | low                  | 31                        | 80                | 12                  | Failure               | Alive            |
| 17  | 53        | F   | intermediate         | 130                       | 54                | 12                  | Failure               | Alive            |
| 18  | 37        | F   | high                 | 20                        | 49                | 12                  | Failure               | Alive            |
| 19  | 68        | M   | –                    | 14                        | 0.098             | 12                  | Optimal               | Alive            |
| 20  | 42        | M   | –                    | 67                        | 0.35              | 12                  | Warning               | Alive            |
| 21  | 45        | F   | –                    | 88                        | 37                | 12                  | Failure               | Alive            |
| 22  | 21        | M   | –                    | 27                        | 1.8               | 12                  | Failure               | Alive            |
| 23  | 69        | M   | –                    | 67                        | 0.03              | 12                  | Optimal               | Died*            |
| 24  | 35        | M   | intermediate         | 15                        | 2.4               | 12                  | Failure               | Alive            |
| 25  | 39        | F   | intermediate         | 32                        | 7.8               | 12                  | Failure               | Alive            |
| 26  | 28        | M   | –                    | 32                        | 13                | 12                  | Failure               | Alive            |
| 27  | 42        | F   | intermediate         | 13                        | 0.24              | 12                  | Warning               | Alive            |
| 28  | 25        | M   | high                 | 36                        | 100               | 12                  | Failure               | Alive            |
| 29  | 54        | M   | –                    | 21                        | 0.0032            | 12                  | Optimal               | Alive            |
| 30  | 42        | M   | intermediate         | 7                         | 15                | 6                   | Failure               | Alive            |
| 31  | 19        | M   | –                    | 17                        | 100               | 12                  | Failure               | Died             |
| 32  | 61        | F   | high                 | 5                         | 37                | 3                   | Failure               | Alive            |
| 33  | 52        | M   | intermediate         | 97                        | 4.8               | 12                  | Failure               | Alive            |
| 34  | 45        | M   | –                    | 63                        | 80                | 12                  | Failure               | Died             |
| 35  | 35        | M   | –                    | 123                       | 36                | 12                  | Failure               | Alive            |
| 36  | 23        | M   | high                 | 13                        | 0.21              | 12                  | Warning               | Alive            |
| 37  | 34        | M   | intermediate         | 12                        | 0.098             | 12                  | Optimal               | Alive            |

| No. | Age (yrs) | Sex | Sokal Score Category | Duration on Imatinib (mo) | BCR-ABL/ABL ratio | ELN time point (mo) | ELN Response Category | Outcome at 22 mo |
|-----|-----------|-----|----------------------|---------------------------|-------------------|---------------------|-----------------------|------------------|
| 38  | 70        | F   | high                 | 44                        | 0.19              | 12                  | Warning               | Died*            |
| 39  | 62        | F   | –                    | 60                        | 0.0028            | 12                  | Optimal               | Alive            |
| 40  | 50        | M   | high                 | 51                        | 69                | 12                  | Failure               | Died             |
| 41  | 41        | M   | intermediate         | 52                        | 42                | 12                  | Failure               | Alive            |
| 42  | 48        | M   | intermediate         | 25                        | 33                | 12                  | Failure               | Alive            |
| 43  | 40        | F   | –                    | 59                        | 36                | 12                  | Failure               | Alive            |
| 44  | 68        | F   | high                 | 18                        | 110               | 12                  | Failure               | Alive            |
| 45  | 27        | F   | –                    | 110                       | 45                | 12                  | Failure               | Alive            |
| 46  | 31        | M   | –                    | 41                        | 50                | 12                  | Failure               | Alive            |
| 47  | 33        | M   | high                 | 32                        | 20                | 12                  | Failure               | Alive            |
| 48  | 49        | M   | intermediate         | 122                       | 0.0015            | 12                  | Optimal               | Alive            |
| 49  | 50        | M   | intermediate         | 36                        | 0.028             | 12                  | Optimal               | Alive            |
| 50  | 48        | M   | high                 | 39                        | 90                | 12                  | Failure               | Alive            |
| 51  | 44        | M   | –                    | 40                        | 76                | 12                  | Failure               | Died             |
| 52  | 47        | F   | –                    | 15                        | 29                | 12                  | Failure               | Alive            |
| 53  | 26        | M   | intermediate         | 24                        | 0.13              | 12                  | Optimal               | Alive            |
| 54  | 52        | M   | intermediate         | 43                        | 2.5               | 12                  | Failure               | Alive            |
| 55  | 49        | F   | –                    | 40                        | 1.3               | 12                  | Warning               | Alive            |
| 56  | 55        | M   | high                 | 22                        | 68                | 12                  | Failure               | Alive            |
| 57  | 46        | M   | intermediate         | 16                        | 33                | 12                  | Failure               | Alive            |
| 58  | 29        | M   | low                  | 18                        | 0.025             | 12                  | Optimal               | Alive            |
| 59  | 70        | F   | intermediate         | 59                        | 0.011             | 12                  | Optimal               | Alive            |
| 60  | 24        | M   | low                  | 53                        | 98                | 12                  | Failure               | Died             |
| 61  | 57        | F   | high                 | 13                        | 43                | 12                  | Failure               | Died             |
| 62  | 86        | F   | high                 | 159                       | 0.0003            | 12                  | Optimal               | Died*            |
| 63  | 32        | F   | intermediate         | 23                        | 100               | 12                  | Failure               | Alive            |
| 64  | 40        | F   | –                    | 49                        | 0.022             | 12                  | Optimal               | Alive            |
| 65  | 55        | F   | high                 | 48                        | 0.0005            | 12                  | Optimal               | Died*            |
| 66  | 23        | M   | low                  | 17                        | 0.066             | 12                  | Optimal               | Alive            |
| 67  | 45        | M   | –                    | 32                        | 1.4               | 12                  | Warning               | Alive            |
| 68  | 64        | F   | intermediate         | 28                        | 42                | 12                  | Failure               | Alive            |
| 69  | 35        | M   | –                    | 84                        | 40                | 12                  | Failure               | Alive            |
| 70  | 42        | M   | high                 | 37                        | 100               | 12                  | Failure               | Alive            |
| 71  | 38        | F   | –                    | 68                        | 1.1               | 12                  | Warning               | Alive            |
| 72  | 44        | M   | intermediate         | 16                        | 25                | 12                  | Failure               | Alive            |
| 73  | 54        | M   | –                    | 123                       | 5.1               | 12                  | Failure               | Alive            |
| 74  | 46        | M   | intermediate         | 28                        | 33                | 12                  | Failure               | Died             |
| 75  | 62        | M   | intermediate         | 42                        | 0.0007            | 12                  | Optimal               | Died*            |
| 76  | 55        | F   | high                 | 20                        | 58                | 12                  | Failure               | Died             |

| No. | Age (yrs) | Sex | Sokal Score Category | Duration on Imatinib (mo) | BCR-ABL/ABL ratio | ELN time point (mo) | ELN Response Category | Outcome at 22 mo |
|-----|-----------|-----|----------------------|---------------------------|-------------------|---------------------|-----------------------|------------------|
| 77  | 51        | F   | high                 | 24                        | 5.2               | 12                  | Failure               | Died             |
| 78  | 53        | M   | –                    | 50                        | 37                | 12                  | Failure               | Alive            |
| 79  | 57        | F   | –                    | 72                        | 130               | 12                  | Failure               | Alive            |
| 80  | 60        | M   | intermediate         | 29                        | 45                | 12                  | Failure               | Died             |
| 81  | 67        | M   | high                 | 26                        | 59                | 12                  | Failure               | Died             |
| 82  | 31        | F   | intermediate         | 13                        | 1.7               | 12                  | Failure               | Alive            |
| 83  | 45        | M   | intermediate         | 107                       | 91                | 12                  | Failure               | Alive            |
| 84  | 55        | F   | high                 | 60                        | 67                | 12                  | Failure               | Alive            |
| 85  | 57        | F   | high                 | 12                        | 0.038             | 12                  | Optimal               | Alive            |
| 86  | 60        | F   | high                 | 6                         | 19                | 6                   | Failure               | Alive            |
| 87  | 55        | F   | intermediate         | 96                        | 19                | 12                  | Failure               | Alive            |
| 88  | 21        | M   | low                  | 62                        | 100               | 12                  | Failure               | Alive            |
| 89  | 44        | M   | intermediate         | 5                         | 21                | 3                   | Failure               | Alive            |
| 90  | 41        | M   | –                    | 34                        | 47                | 12                  | Failure               | Alive            |
| 91  | 45        | M   | high                 | 45                        | 61                | 12                  | Failure               | Alive            |
| 92  | 33        | F   | –                    | 96                        | 0.0001            | 12                  | Optimal               | Alive            |
| 93  | 34        | F   | low                  | 9                         | 0.26              | 6                   | Optimal               | Alive            |
| 94  | 39        | F   | –                    | 5                         | 11                | 3                   | Warning               | Alive            |
| 95  | 24        | F   | intermediate         | 7                         | 31                | 6                   | Failure               | Alive            |
| 96  | 55        | M   | intermediate         | 40                        | 0.16              | 12                  | Warning               | Alive            |
| 97  | 18        | F   | high                 | 19                        | 100               | 12                  | Failure               | Died             |
| 98  | 55        | F   | –                    | 83                        | 5.3               | 12                  | Failure               | Alive            |
| 99  | 33        | M   | –                    | 108                       | 1.1               | 12                  | Warning               | Alive            |
| 100 | 34        | F   | high                 | 4                         | 28                | 3                   | Failure               | Alive            |
| 101 | 44        | F   | high                 | 21                        | 30                | 12                  | Failure               | Alive            |
| 102 | 32        | F   | low                  | 84                        | 68                | 12                  | Failure               | Alive            |
| 103 | 50        | F   | intermediate         | 19                        | 35                | 12                  | Failure               | Died             |
| 104 | 60        | F   | –                    | 22                        | 21                | 12                  | Failure               | Alive            |
| 105 | 41        | M   | intermediate         | 18                        | 55                | 12                  | Failure               | Died             |
| 106 | 39        | M   | intermediate         | 4                         | 2.4               | 3                   | Optimal               | Alive            |
| 107 | 54        | F   | high                 | 5                         | 37                | 3                   | Failure               | Alive            |
| 108 | 28        | M   | –                    | 77                        | 0.12              | 12                  | Optimal               | Alive            |
| 109 | 57        | M   | high                 | 100                       | 0.0084            | 12                  | Optimal               | Alive            |
| 110 | 65        | M   | intermediate         | 19                        | 0.36              | 12                  | Warning               | Alive            |
| 111 | 59        | M   | high                 | 20                        | 0.1               | 12                  | Optimal               | Alive            |
| 112 | 45        | F   | intermediate         | 25                        | 61                | 12                  | Failure               | Died             |
| 113 | 58        | M   | –                    | 72                        | 0.071             | 12                  | Optimal               | Alive            |
| 114 | 49        | F   | high                 | 36                        | 1.9               | 12                  | Failure               | Alive            |
| 115 | 39        | F   | –                    | 48                        | 39                | 12                  | Failure               | Alive            |

| No. | Age (yrs) | Sex | Sokal Score Category | Duration on Imatinib (mo) | BCR-ABL/ABL ratio | ELN time point (mo) | ELN Response Category | Outcome at 22 mo |
|-----|-----------|-----|----------------------|---------------------------|-------------------|---------------------|-----------------------|------------------|
| 116 | 35        | F   | –                    | 9                         | 0.0069            | 6                   | Optimal               | Alive            |
| 117 | 38        | M   | high                 | 15                        | 18                | 12                  | Failure               | Alive            |
| 118 | 43        | M   | –                    | 120                       | 71                | 12                  | Failure               | Alive            |
| 119 | 61        | F   | high                 | 14                        | 0.011             | 12                  | Optimal               | Alive            |
| 120 | 54        | M   | high                 | 38                        | 47                | 12                  | Failure               | Alive            |
| 121 | 30        | M   | high                 | 5                         | 20                | 3                   | Failure               | Alive            |
| 122 | 61        | F   | –                    | 89                        | 52                | 12                  | Failure               | Alive            |
| 123 | 44        | M   | intermediate         | 130                       | 110               | 12                  | Failure               | Alive            |
| 124 | 45        | F   | intermediate         | 13                        | 0.34              | 12                  | Warning               | Alive            |
| 125 | 84        | M   | –                    | 146                       | 47                | 12                  | Failure               | Alive            |
| 126 | 37        | M   | intermediate         | 6                         | 30                | 6                   | Failure               | Alive            |
| 127 | 28        | M   | intermediate         | 6                         | 5.9               | 6                   | Warning               | Alive            |
| 128 | 53        | F   | intermediate         | 28                        | 29                | 12                  | Failure               | Alive            |
| 129 | 47        | M   | intermediate         | 18                        | 33                | 12                  | Failure               | Alive            |
| 130 | 71        | F   | –                    | 134                       | 1.5               | 12                  | Failure               | Alive            |
| 131 | 49        | F   | –                    | 105                       | 0.066             | 12                  | Optimal               | Alive            |
| 132 | 43        | M   | –                    | 85                        | 1.1               | 12                  | Warning               | Alive            |
| 133 | 31        | M   | –                    | 103                       | 0.9               | 12                  | Warning               | Alive            |
| 134 | 30        | M   | high                 | 3                         | 2                 | 3                   | Optimal               | Alive            |
| 135 | 54        | F   | high                 | 6                         | 33                | 6                   | Failure               | Died             |
| 136 | 46        | M   | –                    | 55                        | 0.1               | 12                  | Optimal               | Alive            |
| 137 | 48        | M   | –                    | 6                         | 0.025             | 6                   | Optimal               | Alive            |
| 138 | 50        | M   | –                    | 53                        | 68                | 12                  | Failure               | Died             |
| 139 | 32        | F   | –                    | 70                        | 54                | 12                  | Failure               | Died             |
| 140 | 27        | M   | –                    | 144                       | 0.024             | 12                  | Optimal               | Alive            |
| 141 | 52        | F   | high                 | 4                         | 18                | 3                   | Warning               | Alive            |
| 142 | 43        | M   | intermediate         | 7                         | 14                | 6                   | Failure               | Died             |
| 143 | 18        | F   | intermediate         | 138                       | 84                | 12                  | Failure               | Alive            |
| 144 | 44        | F   | –                    | 62                        | 5                 | 12                  | Failure               | Died             |
| 145 | 59        | M   | –                    | 10                        | 35                | 6                   | Failure               | Alive            |
| 146 | 68        | F   | intermediate         | 3                         | 12                | 3                   | Warning               | Died             |
| 147 | 31        | M   | high                 | 12                        | 100               | 12                  | Failure               | Alive            |
| 148 | 49        | F   | –                    | 98                        | 0.0002            | 12                  | Optimal               | Alive            |
| 149 | 54        | F   | intermediate         | 37                        | 22                | 12                  | Failure               | Alive            |
| 150 | 52        | M   | high                 | 39                        | 51                | 12                  | Failure               | Alive            |
| 151 | 52        | M   | high                 | 8                         | 48                | 6                   | Failure               | Alive            |
| 152 | 72        | F   | –                    | 60                        | 59                | 12                  | Failure               | Alive            |
| 153 | 45        | M   | intermediate         | 8                         | 0.23              | 6                   | Optimal               | Alive            |
| 154 | 60        | F   | intermediate         | 54                        | 0.016             | 12                  | Optimal               | Alive            |



| <b>No.</b> | <b>Age (yrs)</b> | <b>Sex</b> | <b>Sokal Score Category</b> | <b>Duration on Imatinib (mo)</b> | <b>BCR-ABL/ABL ratio</b> | <b>ELN time point (mo)</b> | <b>ELN Response Category</b> | <b>Outcome at 22 mo</b> |
|------------|------------------|------------|-----------------------------|----------------------------------|--------------------------|----------------------------|------------------------------|-------------------------|
| 155        | 26               | M          | –                           | 96                               | 0.061                    | 12                         | Optimal                      | Alive                   |
| 156        | 18               | M          | –                           | 120                              | 9.4                      | 12                         | Failure                      | Alive                   |
| 157        | 36               | M          | –                           | 96                               | 36                       | 12                         | Failure                      | Alive                   |
| 158        | 30               | M          | high                        | 31                               | 100                      | 12                         | Failure                      | Died                    |

yrs= years, mo = months, M = Male, F = Female, (–) = Data unavailable, \* cause of death unrelated to CML
